## EDITORIAL NOTE

# Editorial Note: How sex chromosomes get trapped into nonrecombination

The *PLOS Biology* Editors

This Primer [1] discusses a model presented in a Research Article by Jay et al. [2] published in the same issue of *PLOS Biology*.

This Editorial Note informs readers that the Research Article [2] (discussed in this Primer as reference 4) has been retracted [3].

The author notes that the processes initially reported in the retracted article and discussed in this Primer have individually also been reported in other studies, notably the role of inversions in establishing recombination suppression [4] and the sheltering of deleterious mutations [5], and continue to be debated.

## References

1. Käfer J. How sex chromosomes get trapped into nonrecombination. *PLoS Biol.* 2022;20(7): e3001718. <https://doi.org/10.1371/journal.pbio.3001718> PMID: 35882230
2. Jay P, Tezenas E, Véber A, Giraud T. Sheltering of deleterious mutations explains the stepwise extension of recombination suppression on sex chromosomes and other supergenes. *PLoS Biol.* 2022;20(7): e3001698. <https://doi.org/10.1371/journal.pbio.3001698> PMID: 35853091
3. The *PLOS Biology* Editors. Retraction: Sheltering of deleterious mutations explains the stepwise extension of recombination suppression on sex chromosomes and other supergenes. *PLoS Biol* 2025;23(3): e3003106. <https://doi.org/10.1371/journal.pbio.3003106>
4. Lenormand T, Roze D. Y recombination arrest and degeneration in the absence of sexual dimorphism. *Science.* 2022;375(6581):663–6. <https://doi.org/10.1126/science.abj1813> PMID: 35143289
5. Nei M. Accumulation of nonfunctional genes on sheltered chromosomes. *Am Nat.* 1970;104(938):311–22. <https://doi.org/10.1086/282665>

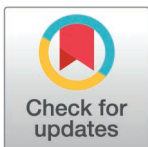

## OPEN ACCESS

**Citation:** The *PLOS Biology* Editors (2025) Editorial Note: How sex chromosomes get trapped into nonrecombination. *PLoS Biol* 23(3): e3003107. <https://doi.org/10.1371/journal.pbio.3003107>

**Published:** March 27, 2025

**Copyright:** © 2025 The *PLOS Biology* Editors. This is an open access article distributed under the terms of the [Creative Commons Attribution License](https://creativecommons.org/licenses/by/4.0/), which permits unrestricted use, distribution, and reproduction in any medium, provided the original author and source are credited.
